# Supplementary material for: Larvicidal Efficacy Against Dengue Vector Aedes aegypti and Antibacterial Activity of Leaf Ethyl Acetate Extract of Clerodendrum indicum (L.) Kuntze
Source: Research Square preprint supplement (doi:10.21203/rs.3.rs-8162261/v1), 2025-12-23
Supplement: Supplementary file 1 [file 89676c20a4308e3458cb7a5d.docx]

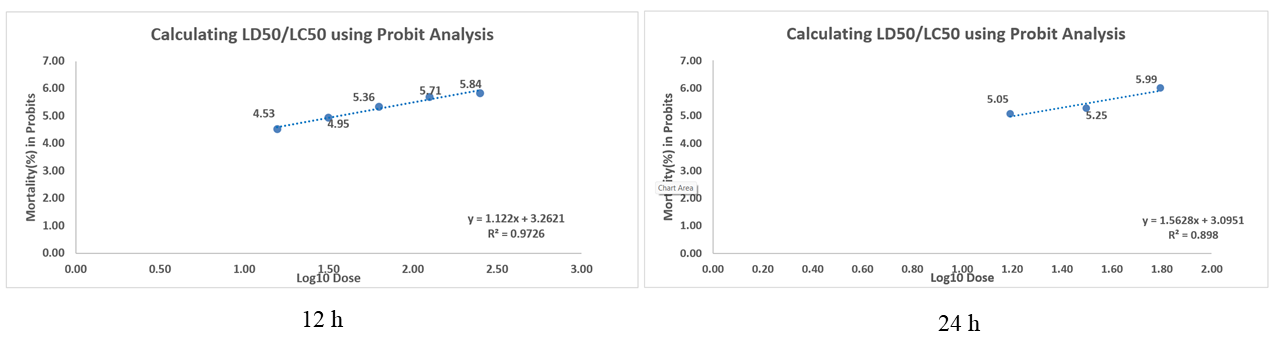


**Figure 1.** LC50 and LC90 values in 12h and 24h EAECI in *Ae. Aegypti* larvae


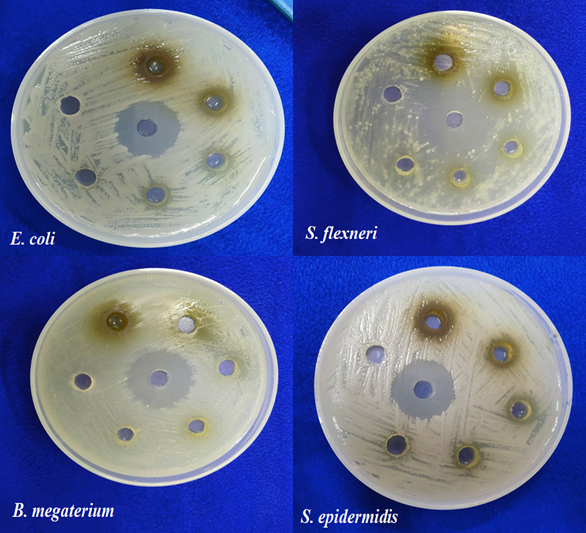


**Figure 2.** Antibacterial activity of ethyl acetate extract of EAECI against four bacterial strains: *E. coli, S. flexneri, B. megaterium* and *S. epidermidis*. Zones of inhibition surrounding the wells indicate varying degrees of antimicrobial effectiveness, suggesting the presence of bioactive compounds in the extract with broad-spectrum antibacterial potential


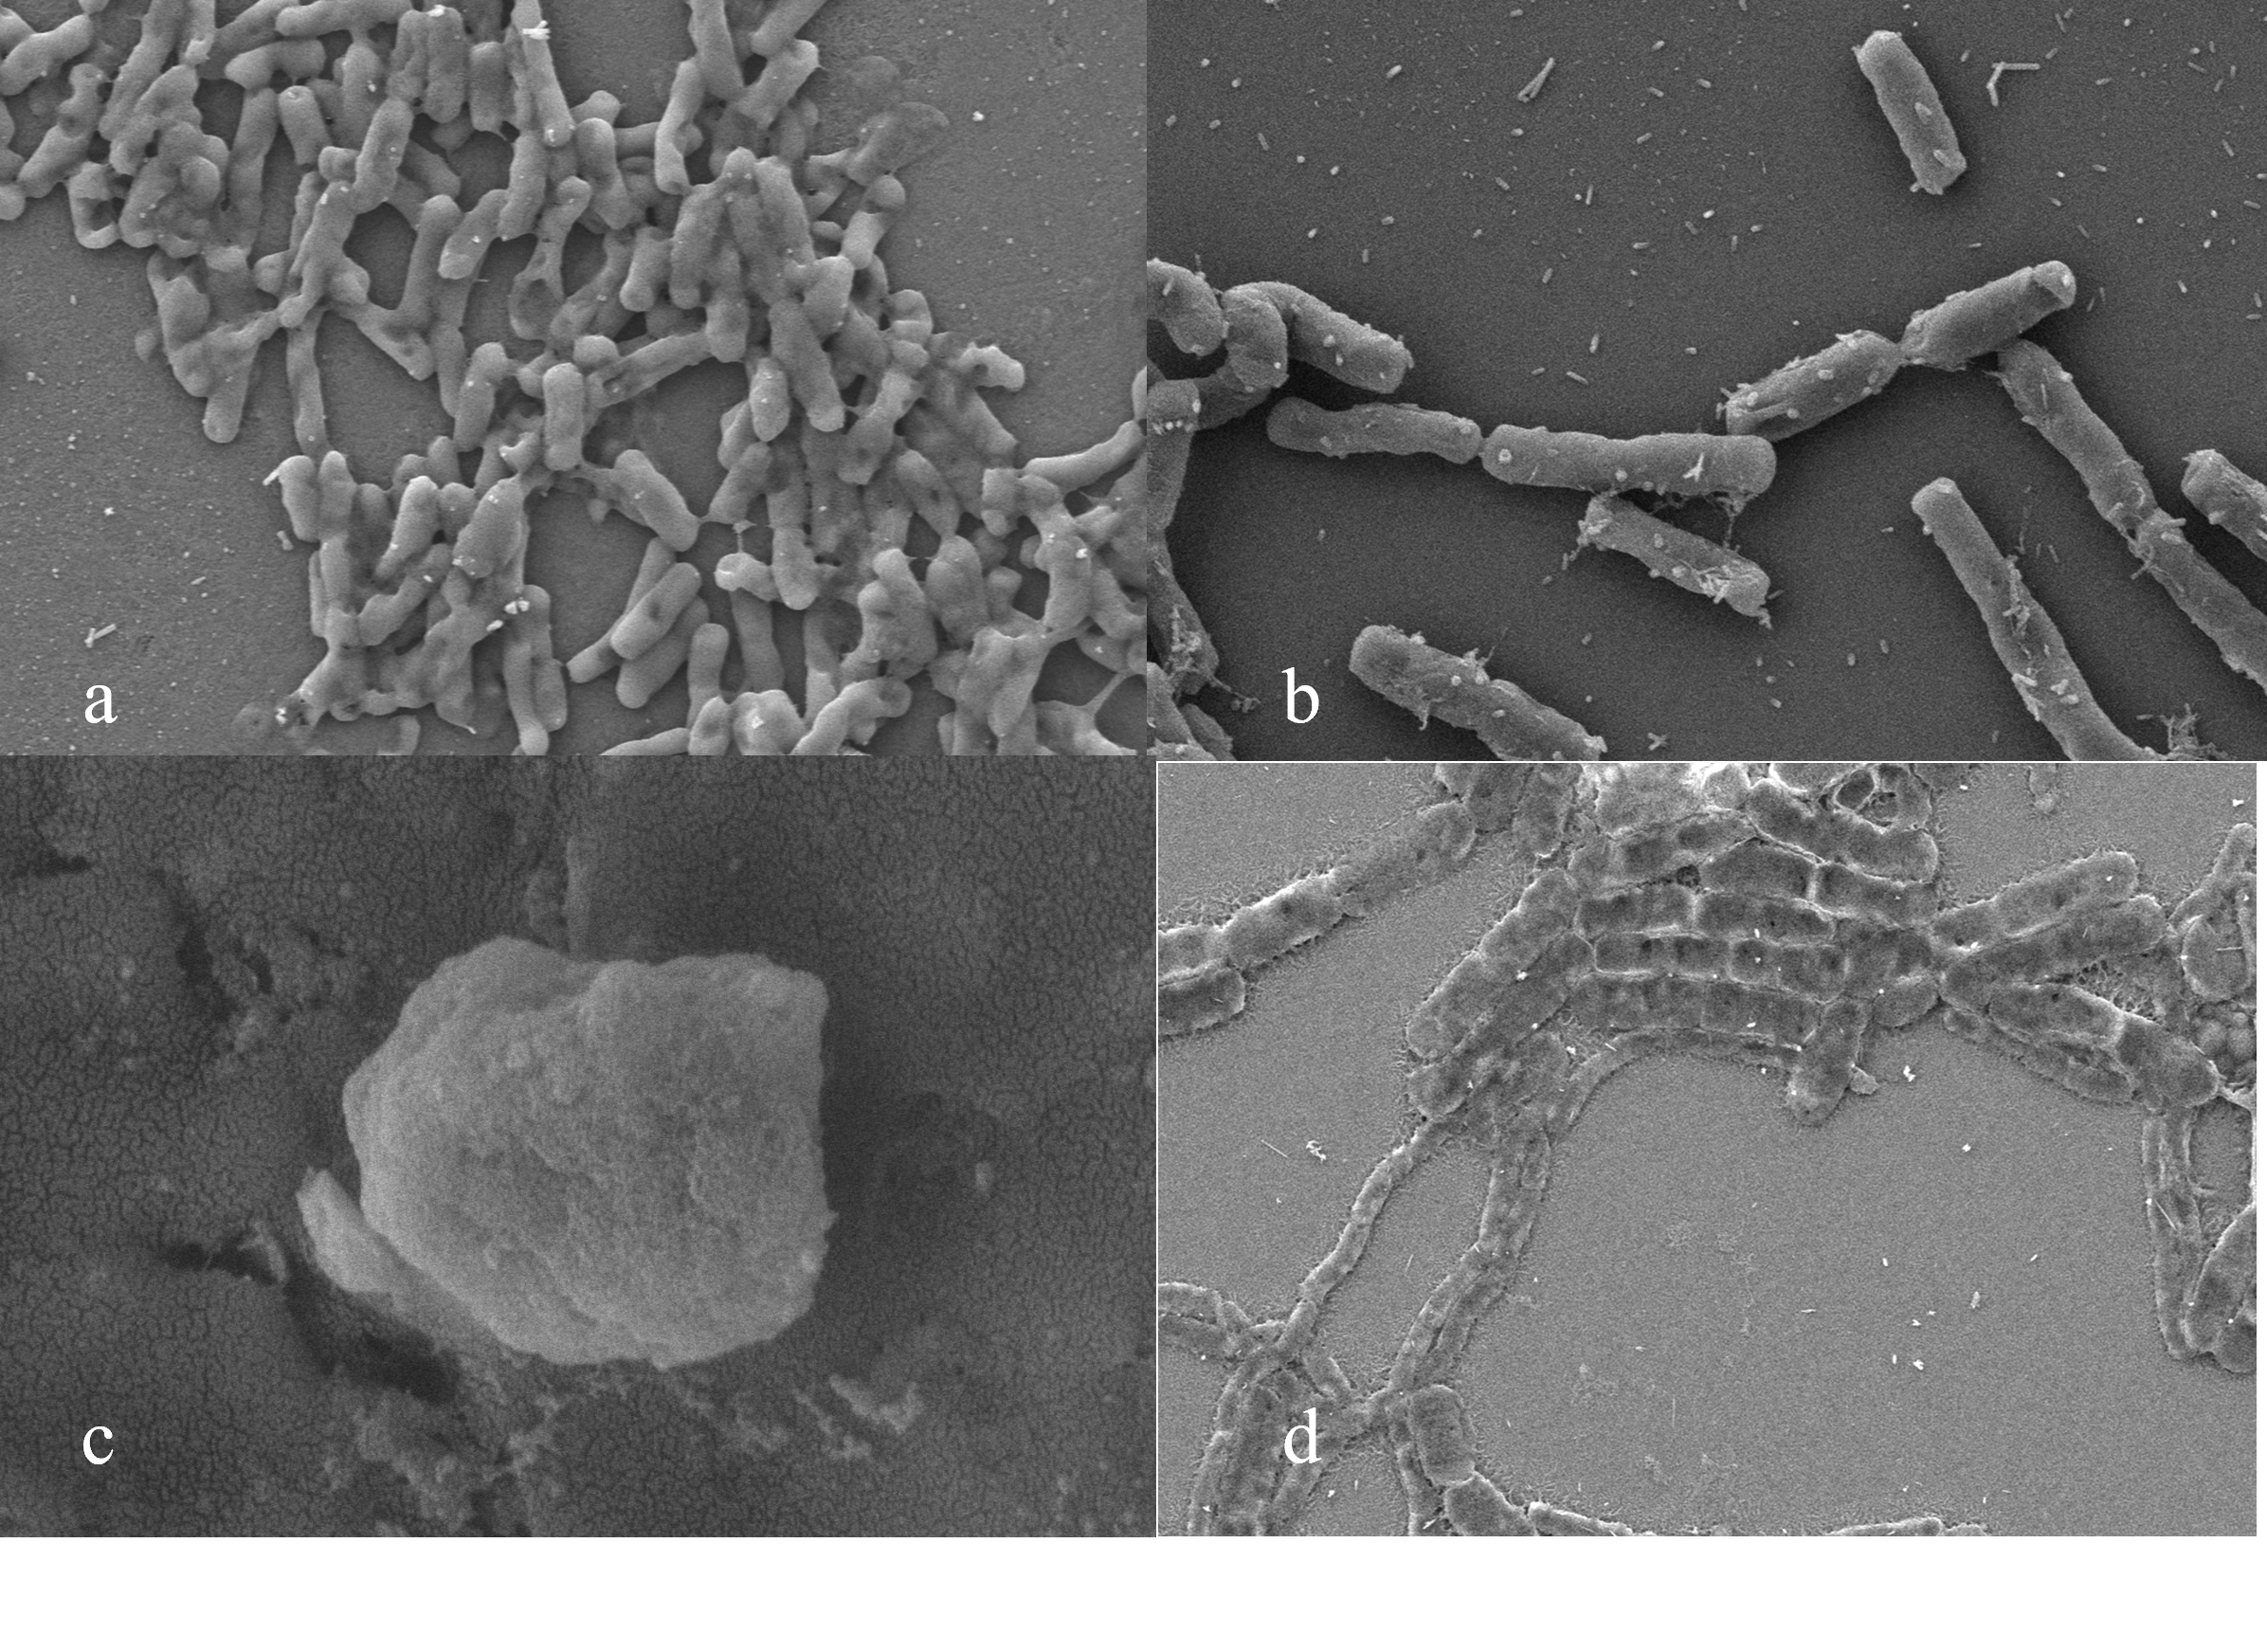


**Figure 3.** Figure 3. Scanning electron micrographs showing the antibacterial effects of ethyl acetate extract of *C. indicum* (EAECI) against four bacterial strains: (a) *E. coli*, (b) *S. flexneri*, (c) *S. epidermidis* and (d) *B. megaterium*. Treated cells exhibit structural alterations such as membrane disintegration, surface roughness, and cellular deformation, indicating bactericidal activity of the extract.


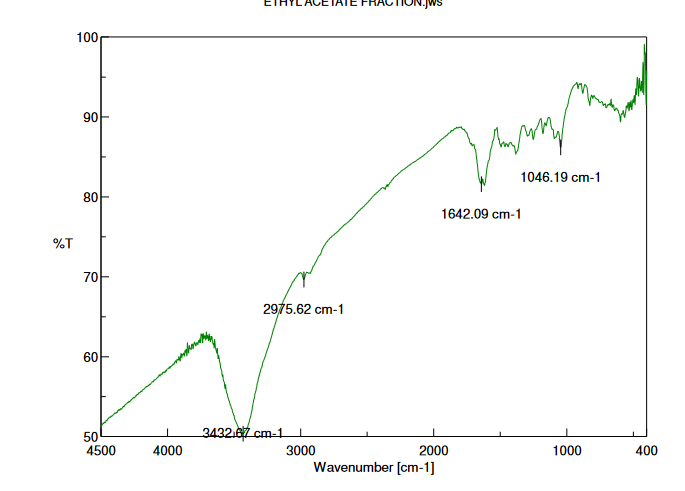


**Figure 4.** FTIR spectrum of the ethyl acetate extract of EAECI. Prominent absorption bands were observed at 3432.67 cm⁻¹ (O–H stretching of hydroxyl groups), 2975.62 cm⁻¹ (C–H stretching of alkanes), 1642.09 cm⁻¹ (C=C or C=O stretching of aromatic or carbonyl groups), and 1046.19 cm⁻¹ (C–O stretching of alcohols or ethers), indicating the presence of diverse functional groups associated with phytochemicals


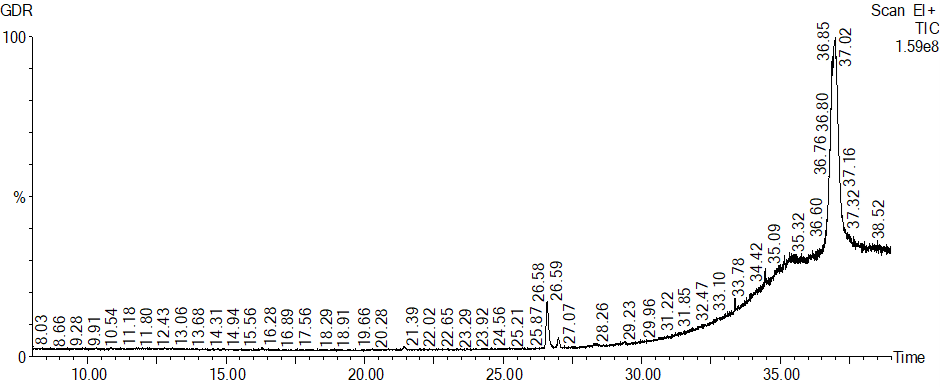


**Figure 5.** GC-MS chromatogram of EAECI, revealing the presence of phytochemical constituents based on retention time and peak area


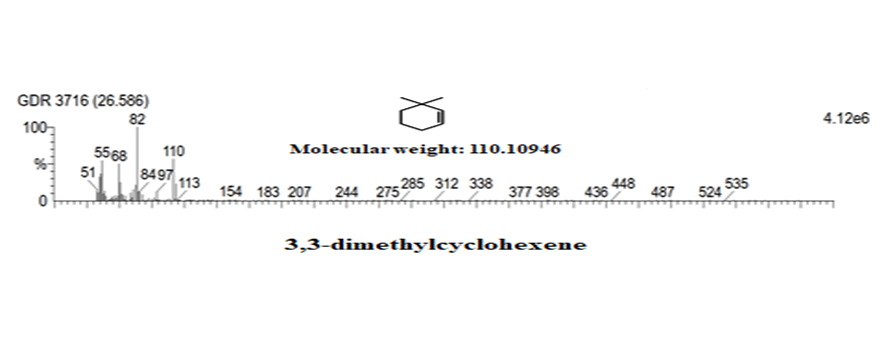


**Figure 6.** GC-MS identification of 3,3-dimethylcyclohexene from C. indicum ethyl acetate extract. Retention Time (RT): 26.586 min; Molecular Formula: C₈H₁₄; Molecular Weight: 110.11 g/mol; Peak Area: 1.74%


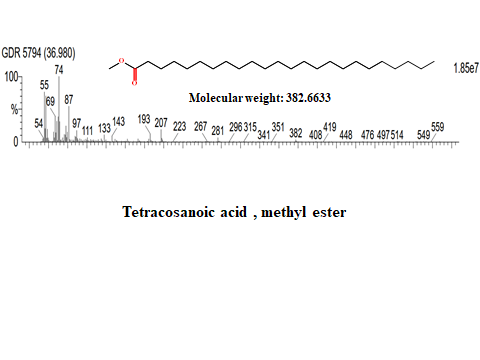


**Figure 7.** GC-MS identification of tetracosanoic acid, methyl ester from C. indicum ethyl acetate extract. Retention Time (RT): 36.980 min; Molecular Formula: C₂₅H₅₀O₂; Molecular Weight: 382.66 g/mol; Peak Area: 36.173%
